# Supplementary material for: Cryptic Transcription Mediates Repression of Subtelomeric Metal Homeostasis Genes
Source: PLoS Genet. 2011 Jun 30;7(6):e1002163. doi: 10.1371/journal.pgen.1002163 (PMC3128112; doi:10.1371/journal.pgen.1002163)
Supplement: Table S1 — List of S.cerevisiae ORFs for which 5′ extended species were observed by tiling microarrays in the upf1Δ and/or xrn1Δstrains. (XLS) [file pgen.1002163.s007.xls]

## Sheet: Intergenic
List of S.cerevisiae ORFs for which 5' extended species were observed by tiling microarrays in the upf1 and/or xrn1 strains
5'-extended	Remark
YAR050W
ARS111
YBL049W
YBR008C	Overlaps ARS209
YBR093C
YBR157C
YBR298C
YCL069W
ARS304
ARS305
YCR006C
YCR007C
YCR091W
YCR105W
YDL245C
YDL243C	overlaps YDL242W
YDL204W
YDL197C
YDL115C
YDL066W	Does not extend in ORF
YDL048C	5'down; ORF up
YDR034C
YDR047W
YDR073W
YDR103W
YDR147W
YDR223W
YDR236C
YDR277C	only upf1
YDR365C
YDR391C
YDR408C	5'UTR ?
YDR538W
YDR545W
YEL069C
YEL049W
YEL030W	5'UTR ?
YEL023C
YER019C-A	Does not extend in ORF
YER020W
YER060W
YER065C
YER066W
YER076C
YER081W	SRG1
YER092W	5'down; ORF up
YER158C
YER175C	Overlaps with YER175W-A
YER187W	only upf1
YFL061W
YFL056C	also dicistronic FL057C
YFL050C
YFL024C
YFR020W
YFR026C
YFR055W
YGL262W
YGL096W
YGL039W
YGL028C	only xrn1
YGR148C	Does not extend in ORF
YHL015W-A
YHR116W
YHR209W	5'UTR ?
YHR211W
YIL169C
YIL164C	also dicistronic YIL165C
YIL077C
YIL003W
YJL161W
YJL106W
YJR004C
YJR152W
YKL220C
YKL218C
YKL163W
YKL161C
YKL128C
YKL101W
YKL090W
YKL071W	also dicistronic YKL070W
YKR050W
YKR102W
YKR103W	also dicistronic YKR104W
YLL056C
YLL025W
YLR037C
YLR125W
YLR155C	YLR156W?
YLR157C
YLR158C
YLR160C
YLR164W
YLR257W
YLR263W
YLR353W
YLR388W	Does not extend in ORF
YML054C-A
YMR009W
YMR018W
YMR090W
YMR118C
YMR150C
YMR271C
YMR317W
YMR320W
YNL160W
YNL046W	5'UTR ?
YNR062C	also 3'extended
YNR072W
YOL165C
YOL164W
YOL163W
YOL011W
YOL001W
YOR009W
YOR075W	Does not extend in ORF
YOR090C
YOR103C	Does not extend in ORF
YOR120W
YOR152C
YOR180C
YOR192C	also 3'extended
YOR222W	Does not extend in ORF
YOR319W
YOR381W
YOR383C
YPL272C
YPL034W
YPR014C	also 3'extended
YPR028W	Does not extend in ORF
YPR192W	also 3'extended; overlaps YPR193C
YPR196W
